# Supplementary material
Source: ML conference proceedings conference paper supplement (https://openaccess.thecvf.com/content/ICCV2025/html/Tong_Any-SSR_How_Recursive_ICCV_2025_paper.html)
Supplement: Supplementary file 1 [file Tong_Any-SSR_How_Recursive_ICCV_2025_supplemental.pdf]

# Any-SSR: How Recursive Least Squares Works in Continual Learning of Large Language Models

## Supplementary Material

### A. Proof of Equation (17)

Proof. According to Eq. (15):

$$\hat{W}_{k+1}^r = R_{k+1}Q_{k+1} = R_{k+1}Q_k + R_{k+1}\tilde{h}_{k+1}^\top Y_{k+1}. \quad (26)$$

Noticed that  $R_{k+1}Q_{k+1}$  can be written as:

$$\begin{aligned} R_{k+1}Q_k &= R_kQ_k - R_k\tilde{h}_{k+1}^\top K\tilde{h}_{k+1}R_kQ_k \\ &= (I - R_k\tilde{h}_{k+1}^\top K\tilde{h}_{k+1})\hat{W}_k, \end{aligned}$$

Where  $K = (I + \tilde{h}_{k+1}R_k\tilde{h}_k^\top)^{-1}$  and  $K \in \mathbb{R}^{n \times n}$ .  
Since

$$KK^{-1} = K(I + \tilde{h}_{k+1}R_k\tilde{h}_{k+1}^\top) = I, \quad (27)$$

we have

$$K = I - K\tilde{h}_{k+1}R_k\tilde{h}_{k+1}^\top. \quad (28)$$

Therefore

$$R_{k+1}Q_k = (I - R_{k+1}\tilde{h}_{k+1}^\top\tilde{h}_{k+1})\hat{W}_k^R. \quad (29)$$

Instantiate Eq. (29) into Eq. (15), we have

$$\hat{W}_{k+1}^r = (I - R_{k+1}\tilde{h}_{k+1}^\top\tilde{h}_{k+1})\hat{W}_k^R + R_{k+1}\tilde{h}_{k+1}^\top Y_{k+1}. \quad (30)$$

which completes the proof.

### B. Additional Model Validation

We have supplemented experiments on TRACE with GLM-4-9B and Qwen3-8B using Any-SSR. Results remain consistent and confirms ASR’s generalizability across architectures:

| Model    | OP (%) | BWT (%) |
|----------|--------|---------|
| GLM-4-9B | 54.6   | -0.3    |
| Qwen3-8B | 55.1   | -0.1    |
